# Supplementary material for: Mechanistic insights into chloroacetic acid production from atmospheric multiphase VOC-chlorine chemistry
Source: Copernicus journal article supplement (doi:10.5194/egusphere-2024-3137), 2024-10-21
Supplement: Supplementary file 1 [file egusphere-2024-3137-supplement.pdf]

*Support material for*

## **Mechanistic Insights into Chloroacetic Acid Production from Atmospheric Multiphase VOC-Chlorine Chemistry**

Mingxue Li<sup>1</sup>, Men Xia<sup>2,3</sup>, Chunshui Lin<sup>1</sup>, Yifan Jiang<sup>1</sup>, Weihang Sun<sup>1</sup>, Yurun Wang<sup>1</sup>, Yingnan Zhang<sup>1</sup>, Maoxia He<sup>4</sup>, Tao Wang<sup>\*.1</sup>

<sup>1</sup>Department of Civil and Environmental Engineering, The Hong Kong Polytechnic University, Hong Kong 999077, China

<sup>2</sup>Institute for Atmospheric and Earth System Research/Physics, Faculty of Science, University of Helsinki, Helsinki 00014, Finland

<sup>3</sup>Aerosol and Haze Laboratory, Beijing Advanced Innovation Center for Soft Matter Science and Engineering, Beijing University of Chemical, Beijing 100029, China

<sup>4</sup>Environment Research Institute, Shandong University, Qingdao 266237, China

Correspondence: Tao Wang ([tao.wang@polyu.edu.hk](mailto:tao.wang@polyu.edu.hk))

This document includes Supplementary Tables S1-S4, and Supplementary Figures S1-S11.

### **Table of contents**

Table S1. Identified Cl-OVOCs and their precursors in previous VOC-Cl chamber experiments.

Table S2. Input data of the chemical box model for the campaign-averaged conditions.

Table S3. Branching ratios and rate constants of alkene + Cl<sup>•</sup> reactions.

Table S4. QC-calculated energies of solvation and aqueous-phase reactions of OVOCs and their reactive uptake coefficients.

Figure S1. The correlation coefficients between important meteorological factors and CAA concentration in (a) 2020 and (b) 2021.

Figure S2. The primary reaction mechanisms of Cl<sup>•</sup> with 1-chloroethane (C<sub>2</sub>H<sub>5</sub>Cl), 1,2-dichloroethane (C<sub>2</sub>H<sub>4</sub>Cl<sub>2</sub>), 1,2-dichloropropane (C<sub>3</sub>H<sub>6</sub>Cl<sub>2</sub>), and ethene (C<sub>2</sub>H<sub>4</sub>).

Figure S3. Box model-simulated diurnal profiles of chloroacetic acid in different scenarios. The simulated results of scenarios II and VI are close to zero.

Figure S4. Relaxed scan of Cl<sup>•</sup> addition to isoprene.

Figure S5. Relaxed scan of Cl<sup>•</sup> addition to methacrolein (MACR).

Figure S6. Relaxed scan of Cl<sup>•</sup> addition to methyl vinyl ketone (MVK).

Figure S7. Proposed the primary reaction mechanisms of Cl<sup>•</sup> with propene (C<sub>3</sub>H<sub>6</sub>).

Figure S8. Proposed the primary reaction mechanisms of Cl<sup>•</sup> with isoprene (C<sub>5</sub>H<sub>8</sub>).

Figure S9. Proposed the primary reaction mechanisms of Cl<sup>•</sup> with methyl vinyl ketone (MVK).

Figure S10. Proposed the primary reaction mechanisms of  $\text{Cl}^\bullet$  with methacrolein (MACR).

Figure S11. Linear relationships between Gibbs free energy of diol reactions and reactive uptake coefficients of carbonyls.

Table S1. Identified Cl-OVOCs and their precursors in previous VOC-Cl chamber experiments.

| Cl-OVOCs            | structure                                                                           | precursor                       | structure                                                                             | Ref.  |
|---------------------|-------------------------------------------------------------------------------------|---------------------------------|---------------------------------------------------------------------------------------|-------|
| formyl chloride     |    | isoprene                        |    | 1,2   |
|                     |                                                                                     | methyl vinyl ketone             |    | 2     |
|                     |                                                                                     | methacrolein                    |    | 2     |
|                     |                                                                                     | 1,3-butadiene                   |    | 2     |
|                     |                                                                                     | 1-butene                        |    | 2     |
|                     |                                                                                     | methyl acrylate                 |    | 3     |
|                     |                                                                                     | methyl 3-chloro-2-oxopropanoate |    | 1     |
| chloro-acetaldehyde |  | 1-butene                        |  | 2     |
|                     |                                                                                     | acrolein                        |  | 4     |
|                     |                                                                                     | methyl vinyl ketone             |  | 2,4   |
|                     |                                                                                     | allyl alcohol                   |  | 5     |
|                     |                                                                                     | 3-buten-2-ol                    |  | 5     |
|                     |                                                                                     | 2-methyl-3-buten-2-ol           |  | 5     |
| chloroacetone       |  | methacrolein                    |  | 2,4,6 |
|                     |                                                                                     | 2-methyl-2-propen-1-ol          |  | 5     |
|                     |                                                                                     | 3-methyl-3-buten-2-one          |  | 7     |

|                                 |                                                                                     |                 |                                                                                       |     |
|---------------------------------|-------------------------------------------------------------------------------------|-----------------|---------------------------------------------------------------------------------------|-----|
| methyl 3-chloro-2-oxopropanoate | 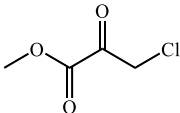   | methyl acrylate |    | 3   |
| 3-chloro-4-hydroxy-2-butanone   |    | crotyl alcohol  |    | 5   |
| 2-chloro-propanal               |    | crotyl alcohol  |    | 5   |
| 4-chloro-crotonaldehyde         |    | 1,3-butadiene   |    | 2,8 |
| chloro-methyl vinyl ketone      |    | 1,3-butadiene   |    | 8   |
| chloro-methylbutenal            |  | isoprene        |    | 1   |
| chloro-methylbutenone           |  | isoprene        |  | 1,2 |

Table S2. Input data of the chemical box model for the campaign-averaged conditions.

| Parameter                                            | Diurnal average <sup>a</sup> | Parameter             | Diurnal average |
|------------------------------------------------------|------------------------------|-----------------------|-----------------|
| T (K)                                                | 297.0 ± 1.0                  | propane (ppb)         | 1.0 ± 0.2       |
| RH (%)                                               | 74.7 ± 5.0                   | isobutane (ppb)       | 0.39 ± 0.07     |
| SO <sub>2</sub> (ppb)                                | 2.7 ± 0.1                    | n-butane (ppb)        | 0.6 ± 0.1       |
| CO (ppb)                                             | 264.8 ± 10.4                 | isopentane (ppb)      | 0.35 ± 0.07     |
| NO (ppb)                                             | 0.33 ± 0.24                  | n-pentane (ppb)       | 0.23 ± 0.03     |
| NO <sub>2</sub> (ppb)                                | 3.2 ± 0.7                    | 2-methylpentane (ppb) | 0.36 ± 0.08     |
| N <sub>2</sub> O <sub>5</sub> (ppb)                  | 0.036 ± 0.029                | n-hexane (ppb)        | 0.16 ± 0.05     |
| HONO (ppb)                                           | 0.15 ± 0.03                  | cyclohexane (ppb)     | 0.022 ± 0.001   |
| O <sub>3</sub> (ppb)                                 | 49.8 ± 9.9                   | acetylene (ppb)       | 1.3 ± 0.2       |
| Sa (um <sup>2</sup> cm <sup>-3</sup> )               | 181.5 ± 23.2                 | ethene (ppb)          | 0.6 ± 0.1       |
| ClNO <sub>2</sub> (ppb)                              | 0.29 ± 0.23                  | propene (ppb)         | 0.10 ± 0.03     |
| Cl <sub>2</sub> (ppb)                                | 0.016 ± 0.014                | isoprene (ppb)        | 0.17 ± 0.10     |
| HOCl (ppb)                                           | 0.039 ± 0.019                | α-pinene (ppb)        | 0.019 ± 0.007   |
| BrCl (ppt)                                           | 0.64 ± 0.38                  | β-pinene (ppb)        | 0.010 ± 0.004   |
| Br <sub>2</sub> (ppt)                                | 3.1 ± 1.0                    | toluene (ppb)         | 0.36 ± 0.06     |
| jNO <sub>2</sub> (10 <sup>-3</sup> s <sup>-1</sup> ) | 6.3 <sup>b</sup>             | benzene (ppb)         | 0.15 ± 0.02     |
| methane                                              | 2000 <sup>c</sup>            | ethylbenzene (ppb)    | 0.05 ± 0.01     |
| ethane (ppb)                                         | 1.7 ± 0.1                    | o-xylene (ppb)        | 0.04 ± 0.02     |

<sup>a</sup>Daily average ± standard deviation; <sup>b</sup>maximum value; <sup>c</sup>constant value.

Table S3. Branching ratios ( $\Gamma$ ) and rate constants ( $k$ ,  $10^{-10}$  cm<sup>3</sup>/molecule s) of alkene + Cl<sup>•</sup> reactions.

| VOC                           | <i>updated model</i>                          |      |           | <i>original model</i>                                                     |      |
|-------------------------------|-----------------------------------------------|------|-----------|---------------------------------------------------------------------------|------|
|                               | $\Gamma$                                      | $k$  | Reference | $\Gamma$                                                                  | $k$  |
| C <sub>3</sub> H <sub>6</sub> | $\alpha$ -C addition: 92%<br>abstraction: 8%  | 2.93 | 9         | $\alpha$ -C addition: 40%<br>$\beta$ -C addition: 50%<br>abstraction: 10% | 2.70 |
| C <sub>5</sub> H <sub>8</sub> | $\alpha$ -C addition: 85%<br>abstraction: 15% | 4.75 | 1         | addition: 100%                                                            | 4.75 |
| MVK                           | $\alpha$ -C addition: 75%<br>abstraction: 25% | 2.20 | 2         | -                                                                         | 2.20 |
| MACR                          | $\alpha$ -C addition: 86%<br>abstraction: 14% | 2.30 | 10        | -                                                                         | 1.70 |

Table S4. QC-calculated energies of solvation and aqueous-phase reactions of OVOCs and their reactive uptake coefficients<sup>1</sup>.

| OVOC                | $\Delta G_{\text{sol}}$ | $\Delta G_{\text{hyd}}^{\ddagger}$ | $\Delta_r G_{\text{hyd}}$ | $\Delta G_{\text{sol}}^{\ddagger}$ | $\lambda$             | Ref.      |
|---------------------|-------------------------|------------------------------------|---------------------------|------------------------------------|-----------------------|-----------|
| formaldehyde        | -1.30                   | 41.84                              | 0.17                      | -8.87                              | $2.00 \times 10^{-3}$ | 11        |
| glyoxal             | -2.68                   | 41.73                              | 0.35                      | -11.13                             | $2.90 \times 10^{-3}$ | 12        |
| methylglyoxal       | -3.30                   | 42.75                              | 1.80                      | -11.58                             | $3.70 \times 10^{-4}$ | 13        |
| 2-butanone          | -3.43                   | 46.30                              | 7.47                      | -7.62                              | $1.50 \times 10^{-4}$ | 14        |
| acetone             | -3.55                   | 47.84                              | 7.93                      | -11.06                             | $1.80 \times 10^{-4}$ | 14        |
| 2,3-butanedione     | -3.78                   | 45.74                              | 5.41                      | -8.10                              | $8.00 \times 10^{-5}$ | 14        |
| formyl chloride     | -1.14                   | 28.79                              | -7.58                     | -9.04                              | $2.34 \times 10^{-2}$ | this work |
| chloro-acetaldehyde | -3.42                   | 42.31                              | 1.87                      | -10.92                             | $8.23 \times 10^{-4}$ | this work |
| chloro-acetone      | -6.52                   | 46.37                              | 8.81                      | -8.40                              | $7.07 \times 10^{-5}$ | this work |
| chloro-butanedione  | -4.27                   | 39.58                              | 1.85                      | -8.55                              | $8.31 \times 10^{-4}$ | this work |
| CMBO                | -5.16                   | 49.06                              | 10.69                     | -10.13                             | $3.63 \times 10^{-5}$ | this work |
| CAA                 | -                       | -                                  | -                         | -                                  | $7.05 \times 10^{-5}$ | 15        |

<sup>1</sup> $\Delta G_{\text{sol}}$  is solvation energy of OVOC,  $\Delta G_{\text{hyd}}^{\ddagger}$  and  $\Delta_r G_{\text{hyd}}$  are the Gibbs free energy barriers and changes in the hydration reactions of OVOC in the aqueous phase,  $\Delta G_{\text{sol}}^{\ddagger}$  is the evaporation energy of diol,  $\lambda$  is the reactive uptake coefficient from references and calculated in this work.

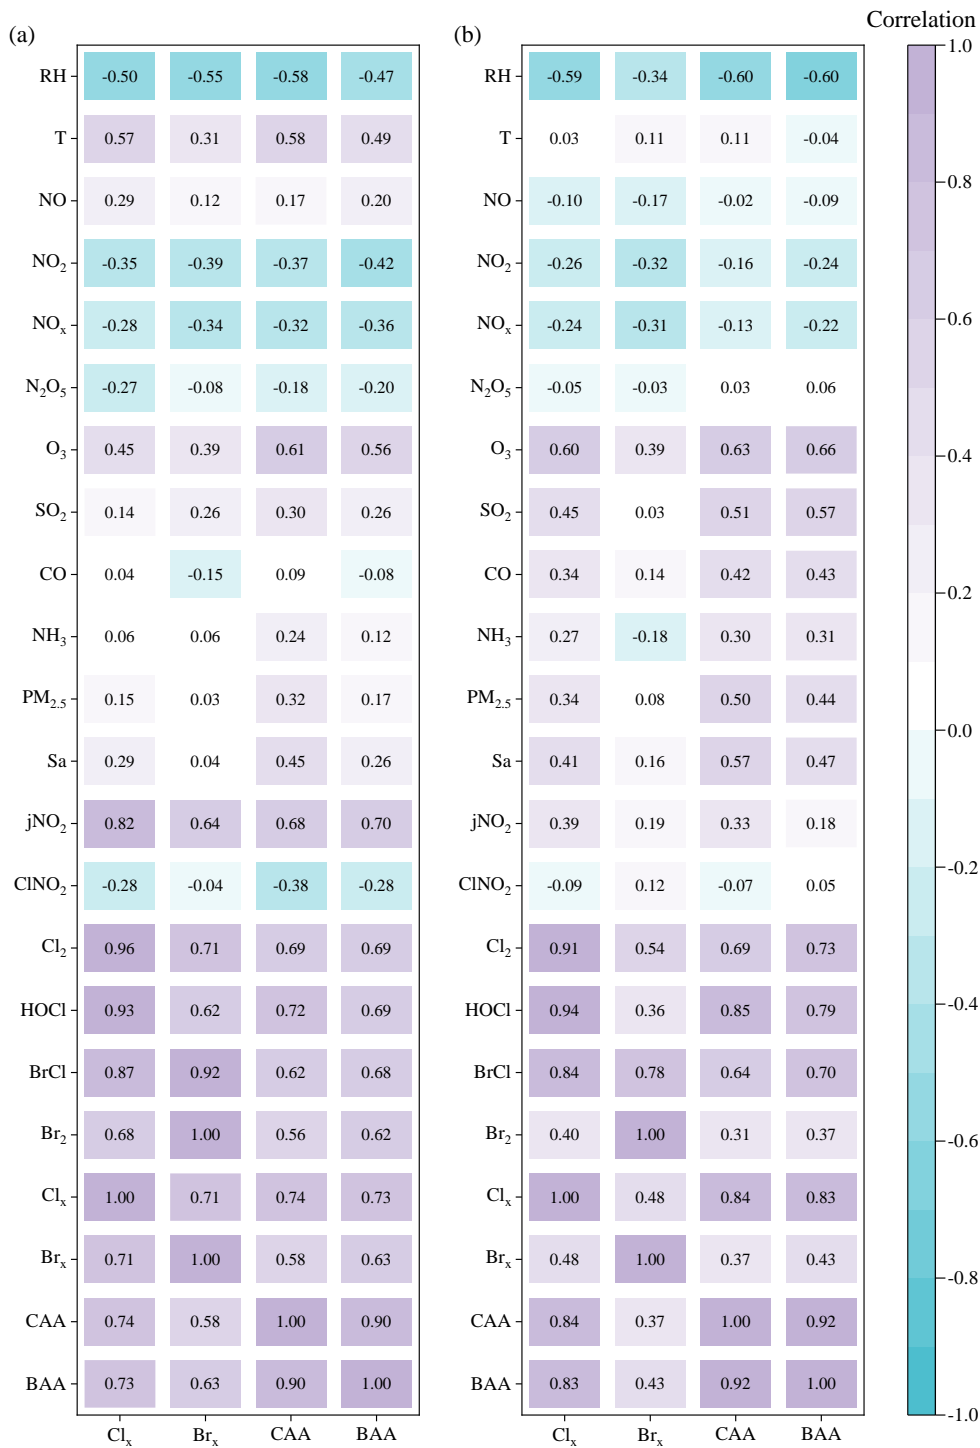

Figure S1. The correlation coefficients between important meteorological factors and CAA concentration in (a) 2020 and (b) 2021.  $Cl_x = 2 \times Cl_2 + HOCl + BrCl$ , and  $Br_x = 2 \times Br_2 + BrCl$ . All data are 1-h averages.

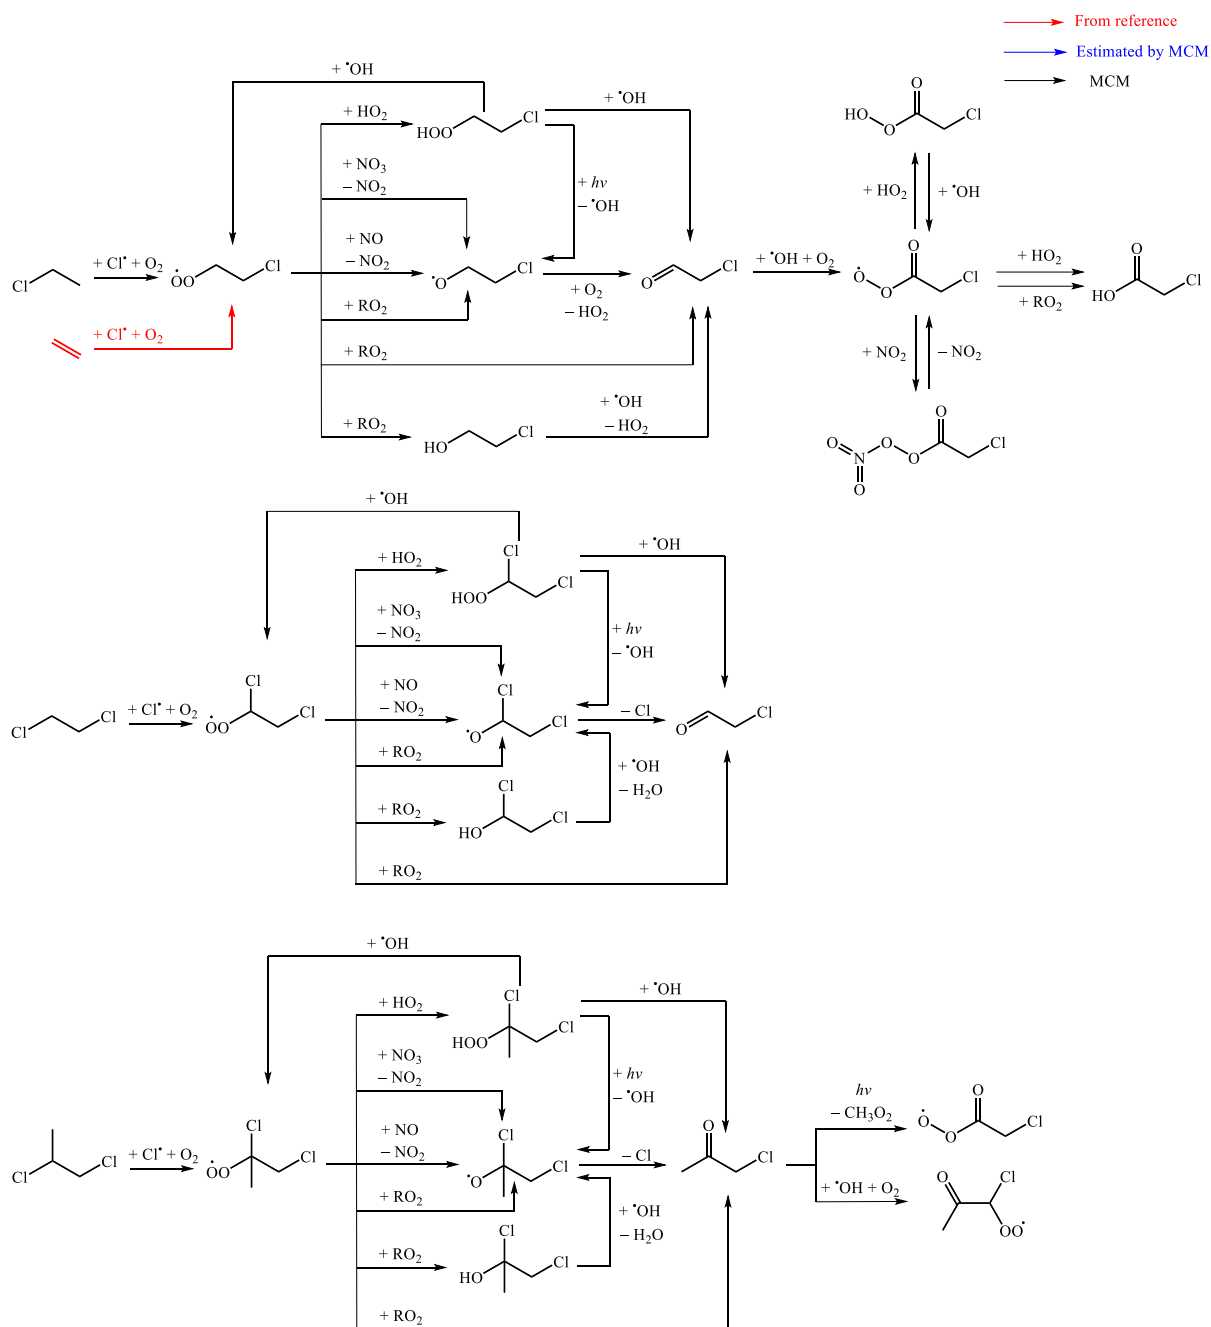

Figure S2. The primary reaction mechanisms of  $\text{Cl}^\bullet$  with 1-chloroethane ( $\text{C}_2\text{H}_5\text{Cl}$ ), 1,2-dichloroethane ( $\text{C}_2\text{H}_4\text{Cl}_2$ ), 1,2-dichloropropane ( $\text{C}_3\text{H}_6\text{Cl}_2$ ), and ethene ( $\text{C}_2\text{H}_4$ ).



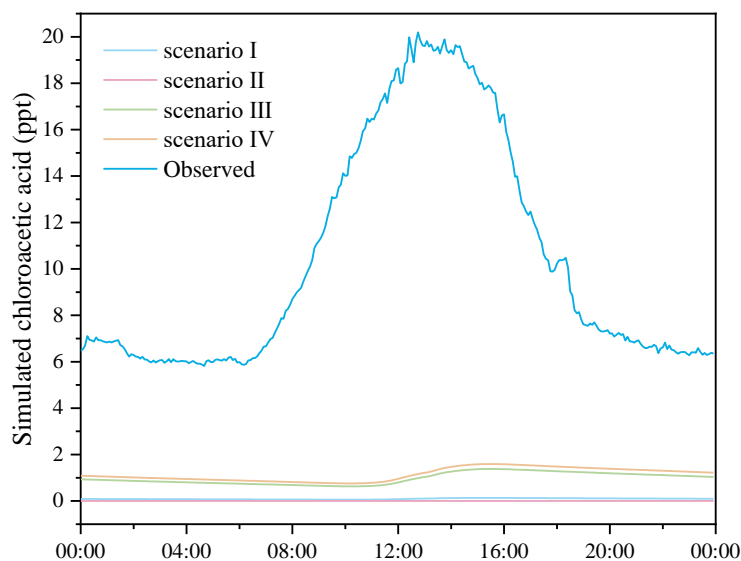

Figure S3. Box model-simulated diurnal profiles of chloroacetic acid in different scenarios. The simulated result of scenario II is close to zero.

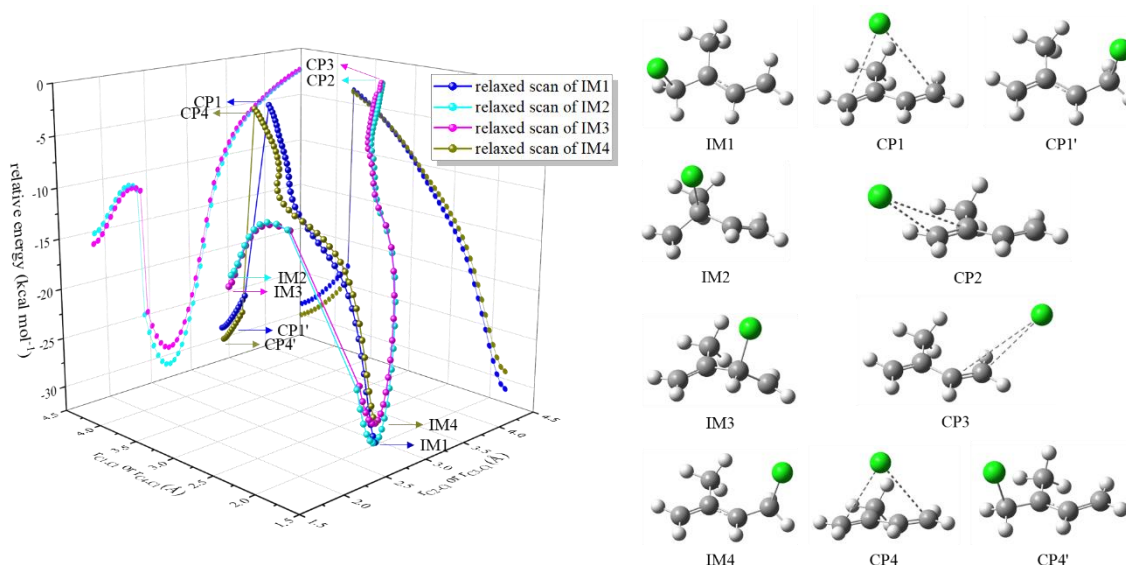

Figure S4. Relaxed scan of  $\text{Cl}^*$  addition to isoprene. IM1, IM2, IM3, and IM4 are intermediates for  $\text{Cl}^*$  addition to 1-, 2-, 3-, and 4-positions of isoprene, and CP1 – CP4, CP1' and CP4' are derived from scans of IM1 – IM2 in terms of bond lengths ( $r$ ) of C-Cl as variables, respectively. Scanned potential energy surfaces of IM1 – IM4 take the total energy of the reactants  $\text{Cl}^* + \text{isoprene}$  as zero for reference. The relative energies of IM1 and IM4 are lowest. A relaxed scan of IM1 reveals a minimum energy path (MEP):  $\text{CP1}' \leftarrow \text{CP1} \leftarrow \text{IM1}$ , where CP1' approximates IM4. The relaxed scan of IM4 also reveals interconversion between IM1 and IM4, but the energy barriers are too high to be difficult to occur. The relaxed scans of IM2 and IM3 reveal the MEP of  $\text{IM2} \leftarrow \text{IM1} \leftarrow \text{CP2}$  and  $\text{IM3} \leftarrow \text{IM4} \leftarrow \text{CP3}$ . Saddle points of IM2 and IM3 are

difficult to reach due to their conversion to IM1 and IM4 passing through low-energy barriers. Thus, Cl<sup>•</sup> prefers to add to 1- and 4-positions of isoprene.

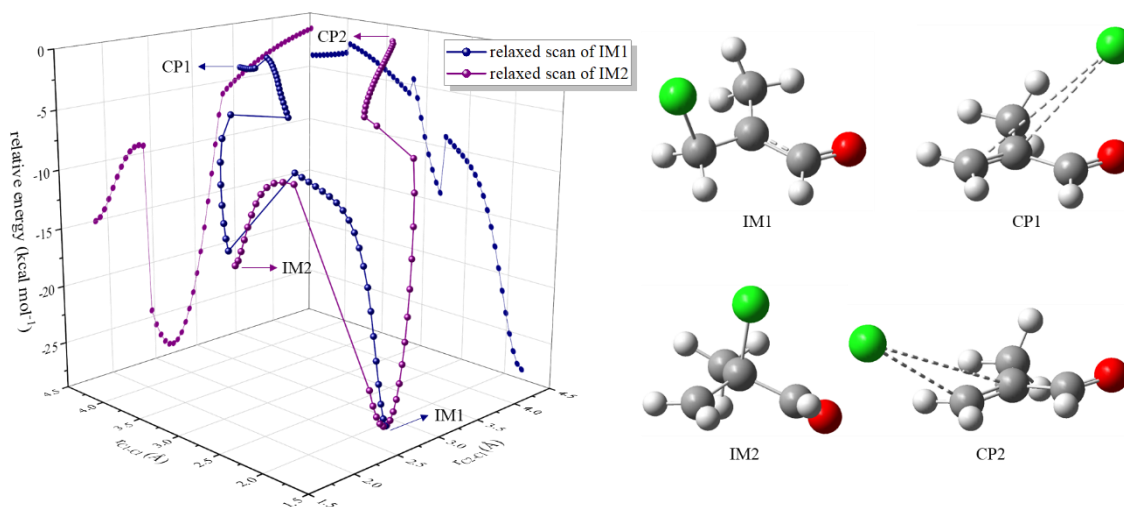

Figure S5. Relaxed scan of Cl<sup>•</sup> addition to methacrolein (MACR). Similar to the Cl<sup>•</sup> addition of propene.

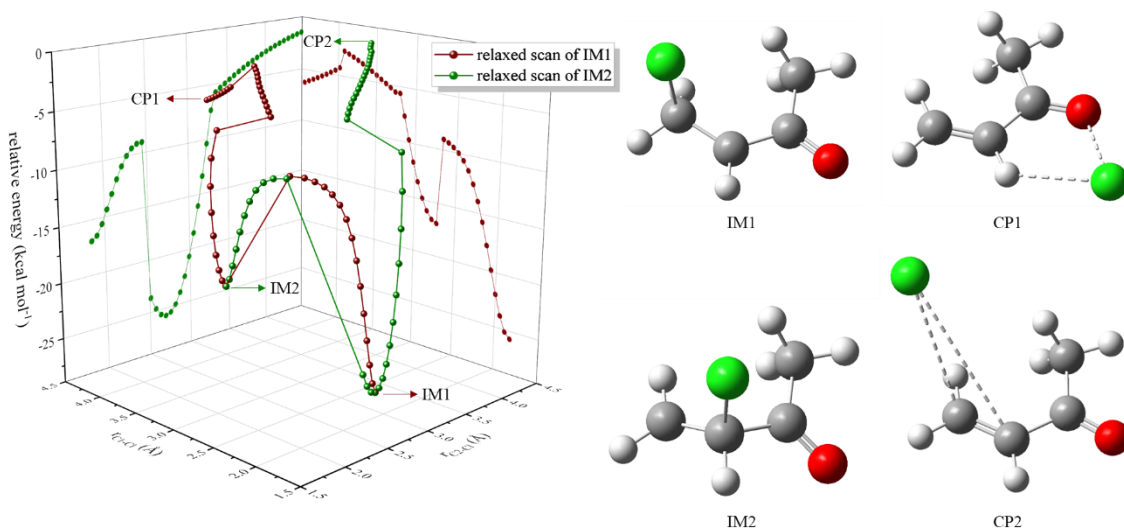

Figure S6. Relaxed scan of Cl<sup>•</sup> addition to methyl vinyl ketone (MVK). Similar to the Cl<sup>•</sup> addition of propene.

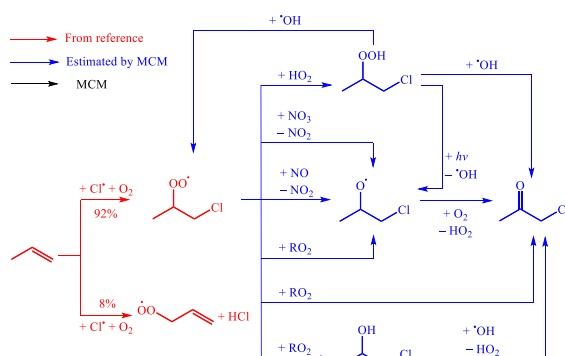

Figure S7. Proposed the primary reaction mechanisms of Cl<sup>•</sup> with propene (C<sub>3</sub>H<sub>6</sub>).

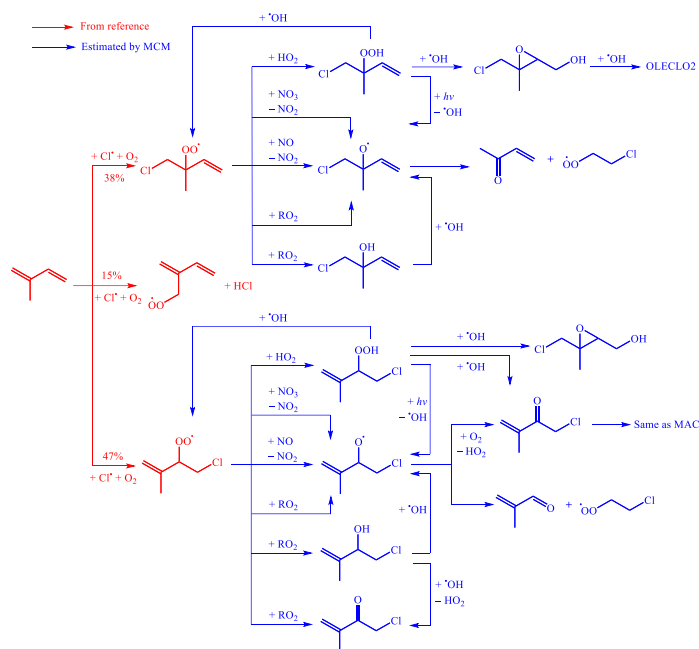

Figure S8. Proposed the primary reaction mechanisms of Cl\* with isoprene (C<sub>5</sub>H<sub>8</sub>).

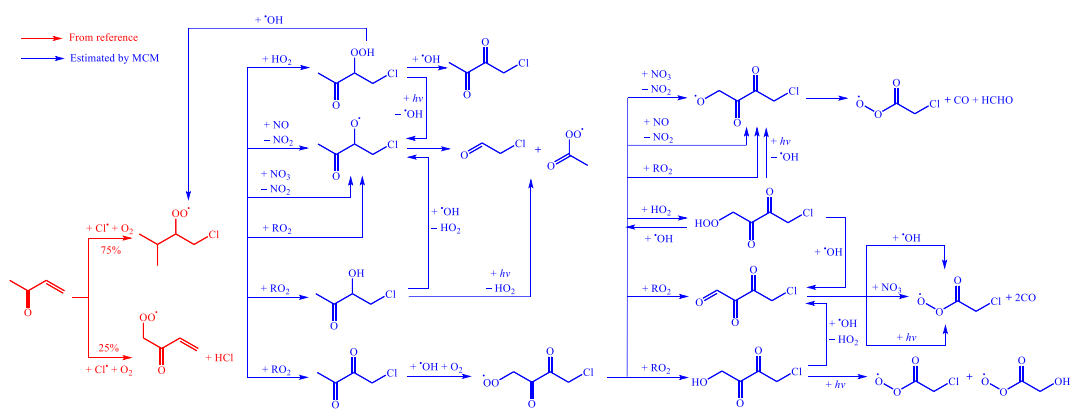

Figure S9. Proposed the primary reaction mechanisms of Cl\* with methyl vinyl ketone (MVK).

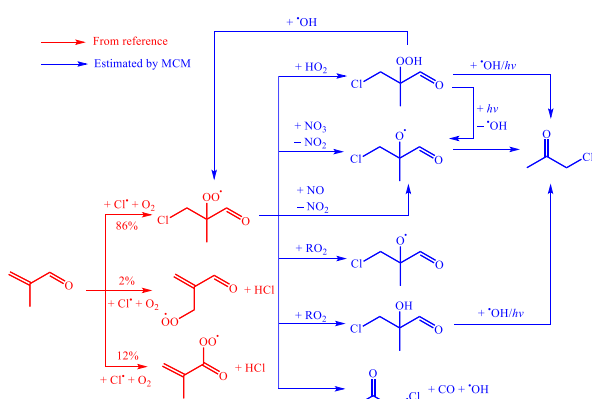

Figure S10. Proposed the primary reaction mechanisms of Cl\* with methacrolein (MACR).

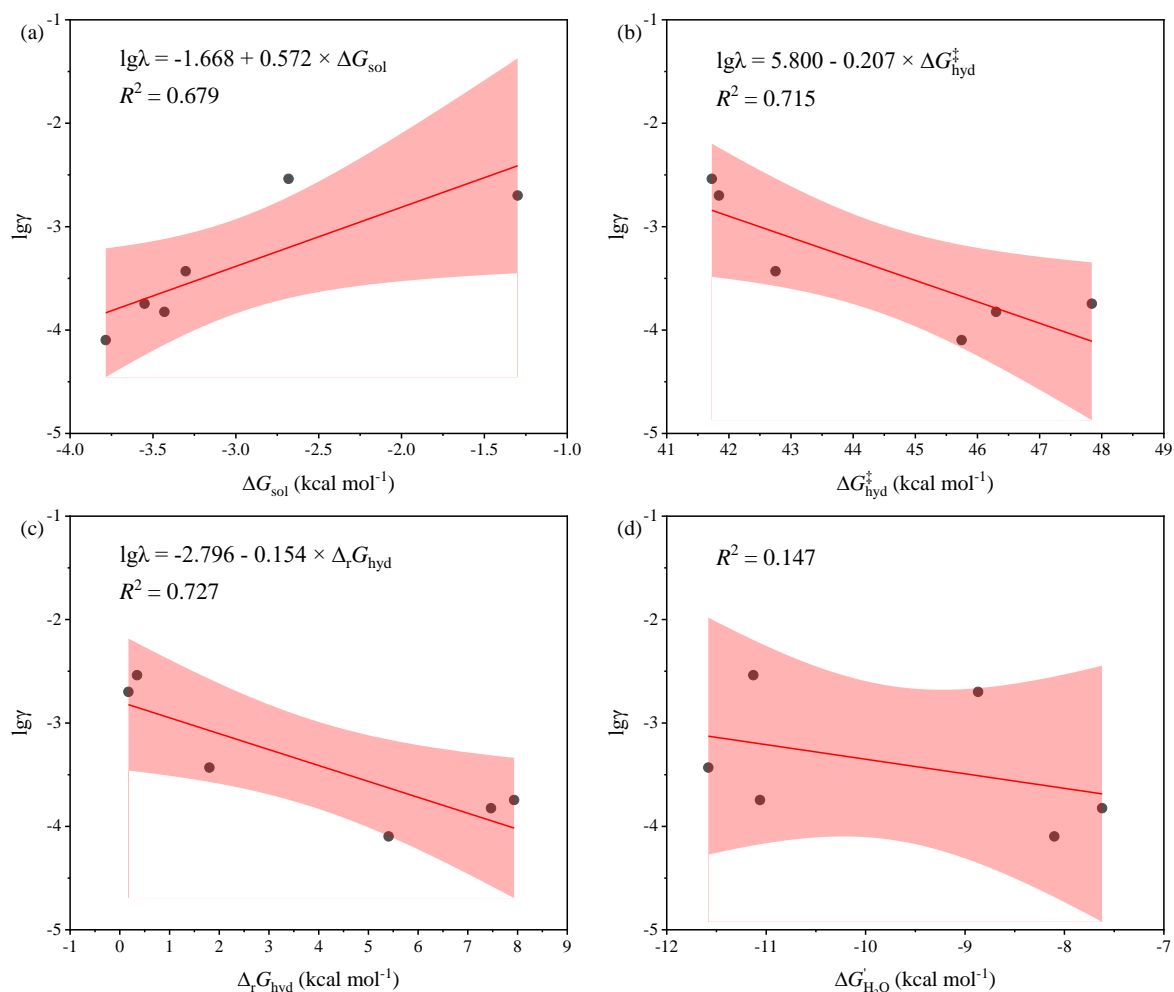

Figure S11. Linear relationships between Gibbs free energy of diol reactions and reactive uptake coefficients of carbonyls. (a)  $\Delta G_{\text{sol}}$  as the solvation energy of carbonyls; (b)  $\Delta G_{\text{hyd}}^{\ddagger}$  and (c)  $\Delta_r G_{\text{hyd}}$  as the Gibbs free energy barriers and changes in the hydration reactions of carbonyls; (d)  $\Delta G_{\text{sol}}^{\ddagger}$  as the evaporation energy of diols;  $\lambda$  as the reactive uptake coefficients.

## Reference

- (1) Wennberg, P. O.; Bates, K. H.; Crouse, J. D.; Dodson, L. G.; McVay, R. C.; Mertens, L. A.; Nguyen, T. B.; Praske, E.; Schwantes, R. H.; Smarte, M. D.; St Clair, J. M.; Teng, A. P.; Zhang, X.; Seinfeld, J. H. Gas-Phase Reactions of Isoprene and Its Major Oxidation Products. *Chem. Rev.* **2018**, *118* (7), 3337–3390. <https://doi.org/10.1021/acs.chemrev.7b00439>.
- (2) Orlando, J. J.; Tyndall, G. S.; Apel, E. C.; Riemer, D. D.; Paulson, S. E. Rate Coefficients and Mechanisms of the Reaction of Cl-Atoms with a Series of Unsaturated Hydrocarbons under Atmospheric Conditions. *Int. J. Chem. Kinet.* **2003**, *35* (8), 334–353. <https://doi.org/10.1002/kin.10135>.
- (3) Blanco, M. B.; Bejan, I.; Barnes, I.; Wiesen, P.; Teruel, M. A. FTIR Product Distribution Study of the Cl and OH Initiated Degradation of Methyl Acrylate at Atmospheric Pressure. *Environ. Sci. Technol.* **2010**, *44* (18), 7031–7036. <https://doi.org/10.1021/es101831r>.
- (4) Canosa-Mas, C. E.; Cotter, E. S. N.; Duffy, J.; Thompson, K. C.; Wayne, R. P. The Reactions of Atomic Chlorine with Acrolein, Methacrolein and Methyl Vinyl Ketone. *Phys. Chem. Chem. Phys.* **2001**, *3* (15), 3075–3084. <https://doi.org/10.1039/b101434j>.

- (5) Rodríguez, A.; Rodríguez, D.; Soto, A.; Bravo, I.; Diaz-de-Mera, Y.; Notario, A.; Aranda, A. Products and Mechanism of the Reaction of Cl Atoms with Unsaturated Alcohols. *Atmos. Environ.* **2012**, *50*, 214–224. <https://doi.org/10.1016/j.atmosenv.2011.12.030>.
- (6) Kaiser, E. W.; Pala, I. R.; Wallington, T. J. Kinetics and Mechanism of the Reaction of Methacrolein with Chlorine Atoms in 1–950 Torr of N<sub>2</sub> or N<sub>2</sub>/O<sub>2</sub> Diluent at 297 K. *J. Phys. Chem. A* **2010**, *114* (25), 6850–6860. <https://doi.org/10.1021/jp103317c>.
- (7) Wang, J.; Zhou, L.; Wang, W.; Ge, M. Gas-Phase Reaction of Two Unsaturated Ketones with Atomic Cl and O<sub>3</sub>: Kinetics and Products. *Phys. Chem. Chem. Phys.* **2015**, *17* (18), 12000–12012. <https://doi.org/10.1039/C4CP05461J>.
- (8) Wang, W.; Finlayson-Pitts, B. J. Unique Markers of Chlorine Atom Chemistry in Coastal Urban Areas: The Reaction with 1,3-butadiene in Air at Room Temperature. *J. Geophys. Res.* **2001**, *106* (D5), 4939–4958. <https://doi.org/10.1029/2000JD900683>.
- (9) Kaiser, E. W.; Wallington, T. J. Pressure Dependence of the Reaction Cl + C<sub>3</sub>H<sub>6</sub>. *J. Phys. Chem.* **1996**, *100* (23), 9788–9793. <https://doi.org/10.1021/jp960406r>.
- (10) Sun, C.; Xu, B.; Zhang, S. Atmospheric Reaction of Cl + Methacrolein: A Theoretical Study on the Mechanism, and Pressure- and Temperature-Dependent Rate Constants. *J. Phys. Chem. A* **2014**, *118* (20), 3541–3551. <https://doi.org/10.1021/jp500993k>.
- (11) Iraci, L. T.; Tolbert, M. A. Heterogeneous Interaction of Formaldehyde with Cold Sulfuric Acid: Implications for the Upper Troposphere and Lower Stratosphere. *J. Geophys. Res.* **1997**, *102* (D13), 16099–16107. <https://doi.org/10.1029/97JD01259>.
- (12) Liggio, J.; Li, S.; McLaren, R. Reactive Uptake of Glyoxal by Particulate Matter. *J. Geophys. Res.* **2005**, *110* (D10), 2004JD005113. <https://doi.org/10.1029/2004JD005113>.
- (13) De Haan, D. O.; Jimenez, N. G.; De Loera, A.; Cazaunau, M.; Gratien, A.; Pangui, E.; Doussin, J.-F. Methylglyoxal Uptake Coefficients on Aqueous Aerosol Surfaces. *J. Phys. Chem. A* **2018**, *122* (21), 4854–4860. <https://doi.org/10.1021/acs.jpca.8b00533>.
- (14) Schütze, M.; Herrmann, H. Uptake of Acetone, 2-Butanone, 2,3-Butanedione and 2-Oxopropanal on a Water Surface. *Phys. Chem. Chem. Phys.* **2004**, *6* (5), 965–971. <https://doi.org/10.1039/B313474A>.
- (15) Wang, Y.; Zhou, L.; Wang, W.; Ge, M. Heterogeneous Uptake of Formic Acid and Acetic Acid on Mineral Dust and Coal Fly Ash. *ACS Earth Space Chem.* **2020**, *4* (2), 202–210. <https://doi.org/10.1021/acsearthspacechem.9b00263>.
